# Supplementary material
Source: publisher figshare collection journal article supplement (https://karger.figshare.com/ndownloader/files/26062595)
Supplement: Supplementary file 1 [file 26062595]

**Supplementary appendix**

**Figure Legneds for Supplementary Figures**

Fig. S1. Forest plot of mechanical ventilation in patients with PCOPD and ECOPD.

PCOPD, chronic obstructive pulmonary disease with community-acquired pneumonia; ECOPD, acute exacerbation of chronic obstructive pulmonary disease; CI, confidence interval; df, degrees of freedom; M-H, Mantel-Haenszel method

Fig. S2. Forest plot of ICU admission in patients with PCOPD and ECOPD.

PCOPD, chronic obstructive pulmonary disease with community-acquired pneumonia; ECOPD, acute exacerbation of chronic obstructive pulmonary disease; CI, confidence interval; df, degrees of freedom; M-H, Mantel-Haenszel method; ICU, intensive care unit.

Fig. S3. Forest plot of length of hospital stay in patients with PCOPD and ECOPD.

PCOPD, chronic obstructive pulmonary disease with community-acquired pneumonia; ECOPD, acute exacerbation of chronic obstructive pulmonary disease; SD, standard deviation; CI, confidence interval; df, degrees of freedom; IV, inverse variance method.

Fig. S4. Forest plot of length of ICU stay in patients with PCOPD and ECOPD.

PCOPD, chronic obstructive pulmonary disease with community-acquired pneumonia; ECOPD, acute exacerbation of chronic obstructive pulmonary disease; SD, standard deviation; CI, confidence interval; df, degrees of freedom; IV, inverse variance method.

Fig. S5. Forest plot of readmission in patients with PCOPD and ECOPD.

PCOPD, chronic obstructive pulmonary disease with community-acquired pneumonia; ECOPD, acute exacerbation of chronic obstructive pulmonary disease; CI, confidence interval; df, degrees of freedom; M-H, Mantel-Haenszel method.

Fig. S6. Funnel plot for mortality.

SE, standard error; RR, relative risk.
